# Supplementary material for: The miR-17-92 cluster counteracts quiescence and chemoresistance in a distinct subpopulation of pancreatic cancer stem cells
Source: HighWire-hosted journal article supplement (doi:10.1136/gutjnl-2014-308470), 2015-04-17

**Figure S1 – Gemcitabine resistant cells are enriched for CSCs.** (A) Flow cytometry for surface expression of CD133, SSEA1, and CXCR4 in Gemcitabine resistant cells versus control cells. (B) QPCR analysis of pluripotency-associated genes (**left panel**) and genes related to EMT (**right panel**). (C) QPCR analysis for expression of TGFBR2, ALK4, SMAD2, SMAD4, and TBX3 in gemcitabine resistant cells versus control cells. (D) QPCR analysis for the expression of ABC transporters (ABCC1 and ABCG2) and Gemcitabine transporters (hENT1, hENT2, hCNT1, and hCNT3) in gemcitabine resistant cells versus control cells. Data are normalized for  $\beta$ -Actin expression. (E) Flow cytometry analysis of gemcitabine treated tumors depleted by MACS for mouse CD45 and mouse CD146.

**Figure S1 – Gemcitabine resistant cells are enriched for CSCs**

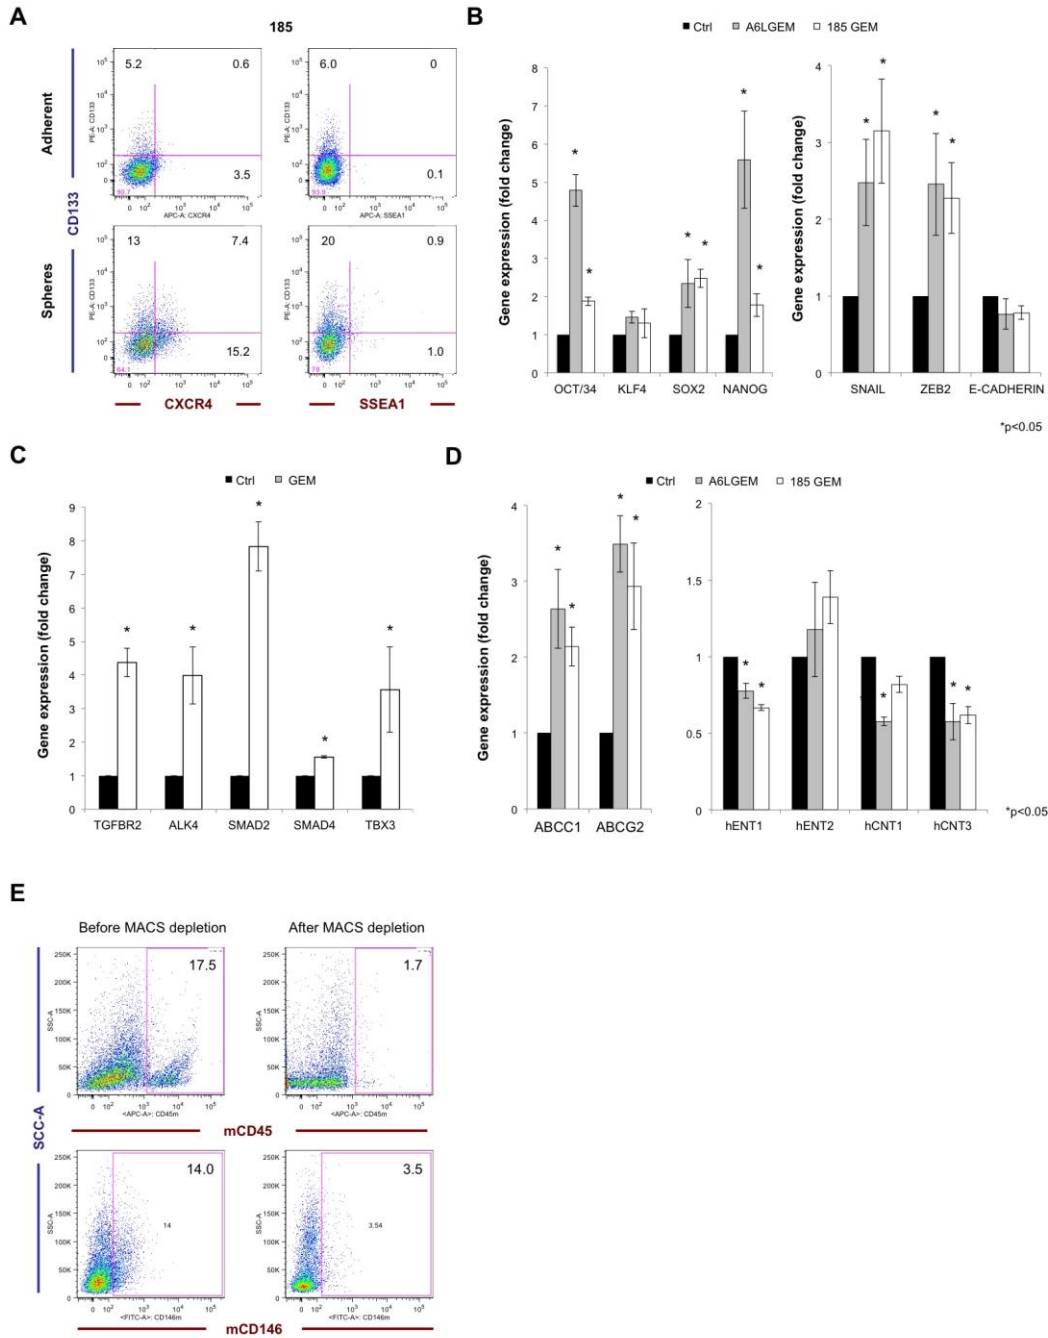

**Figure S2 – Slow cycling cells possess CSC phenotype.** (A) Flow cytometry for surface expression of CD133, SSEA1, and CXCR4 in PKH26+ and PKH26– cells, respectively (B) Sphere formation capacity of PKH26+ versus PKH26– cells isolated from A6L, 253, and 354 PDAC tumors (n=3; \*P<0.05).

**Figure S2 – Slow cycling cells possess CSC phenotype**

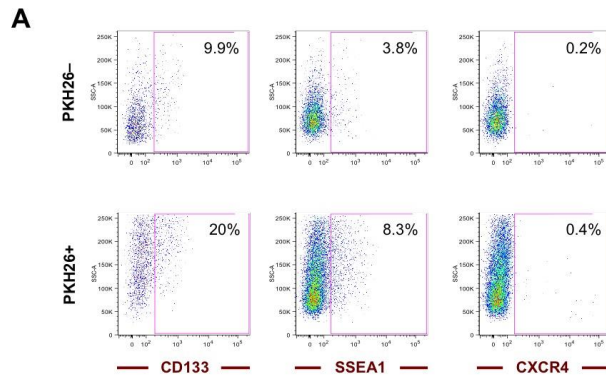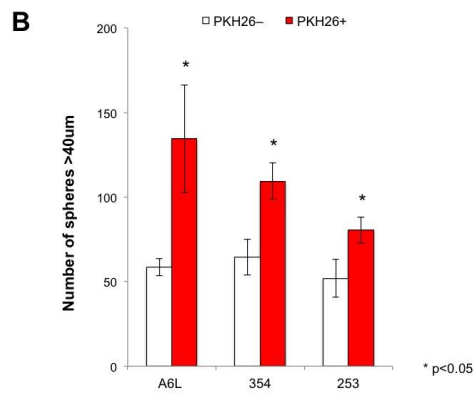

**Figure S3 – miR-17-92 downregulation in spheres and in gemcitabine resistant cells.** (A) QPCR analysis for the expression of miR-17-92 family members in Gemcitabine resistant cells and spheres versus respective control cells. (B) QPCR analysis for the expression of miR-17-92 family members in PKH26+ and PKH26– cells isolated from 185 and 354 PDAC tumors. (C) Western blot analysis for the expression of the cell cycle regulator p21 in adherent cells treated with antagomir-17-92 versus antagomir-Ctrl. (D) *In vivo* tumorigenicity of A6L and 185 treated with antagomir-17-92 versus antagomir-Ctrl.

**Figure S3 – miR-17-92 downregulation in spheres and in gemcitabine resistant cells**

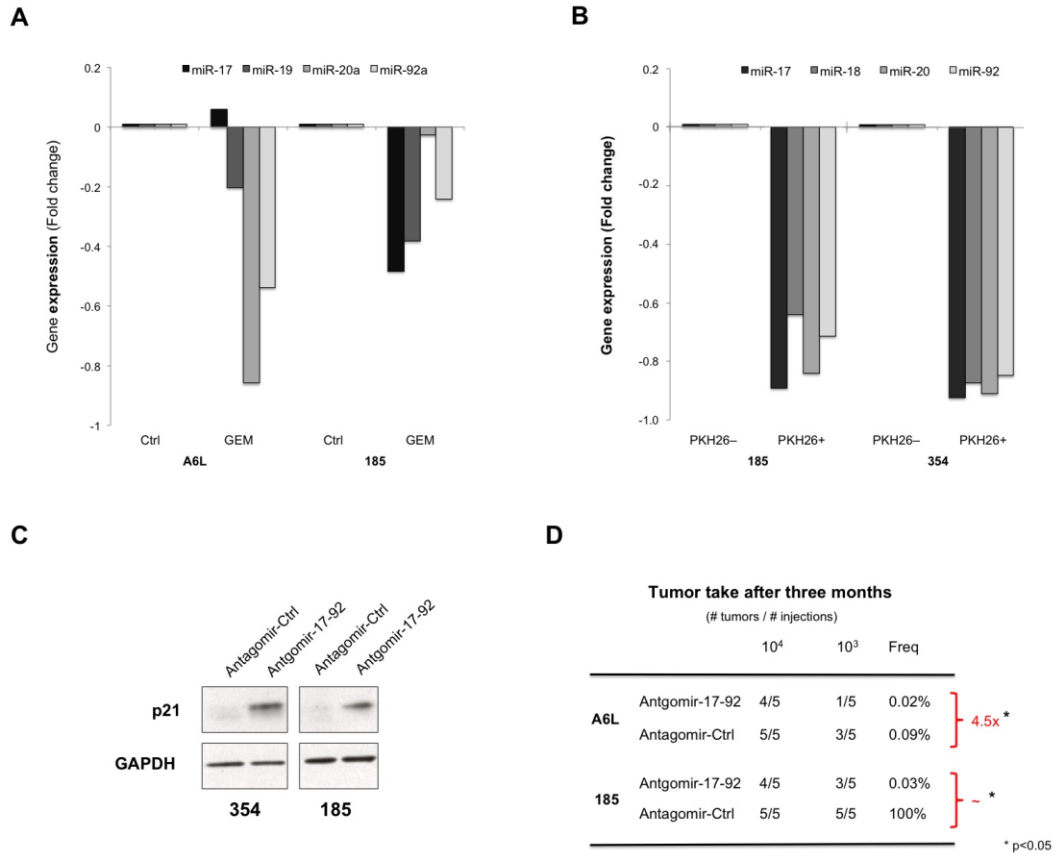

**Figure S4 – miR-17-92 overexpression impairs CSC phenotype.** (A) Lentiviral overexpression of miR-17-92 in CSCs. Representative images of GFP expression post infection (**upper panel**), illustration of the utilized sorting strategy (**middle panel**), and qPCR analysis for the expression of miR-17-92 family members in GFP sorted cells (**lower panel**). (B) QPCR analysis for the expression of pluripotency-associated genes in miR-17-92 cells versus miR-Ctrl cells. (C) Representative images for  $\beta$ -galactosidase staining in miR-17-92 cells versus miR-Ctrl cells. (D) Percentage of PKH26+ cells over a period of 4 weeks in miR-17-92 cells versus miR-Ctrl. (E) Sphere counts during serial *in vivo* passaging of miR-17-92 cells versus miR-Ctrl cells. (F) Cell cycle analysis using Ki67 and DAPI of cell freshly isolated cells after serial *in vivo* passaging. (G) Quantification of migratory activity in the wound-healing assay with stimulation of TGF- $\beta$ 1 or NODAL in the presence or absence of the ALK4,5,7 inhibitor SB 431502.

**Figure S4 – miR-17-92 overexpression impairs CSC phenotype**

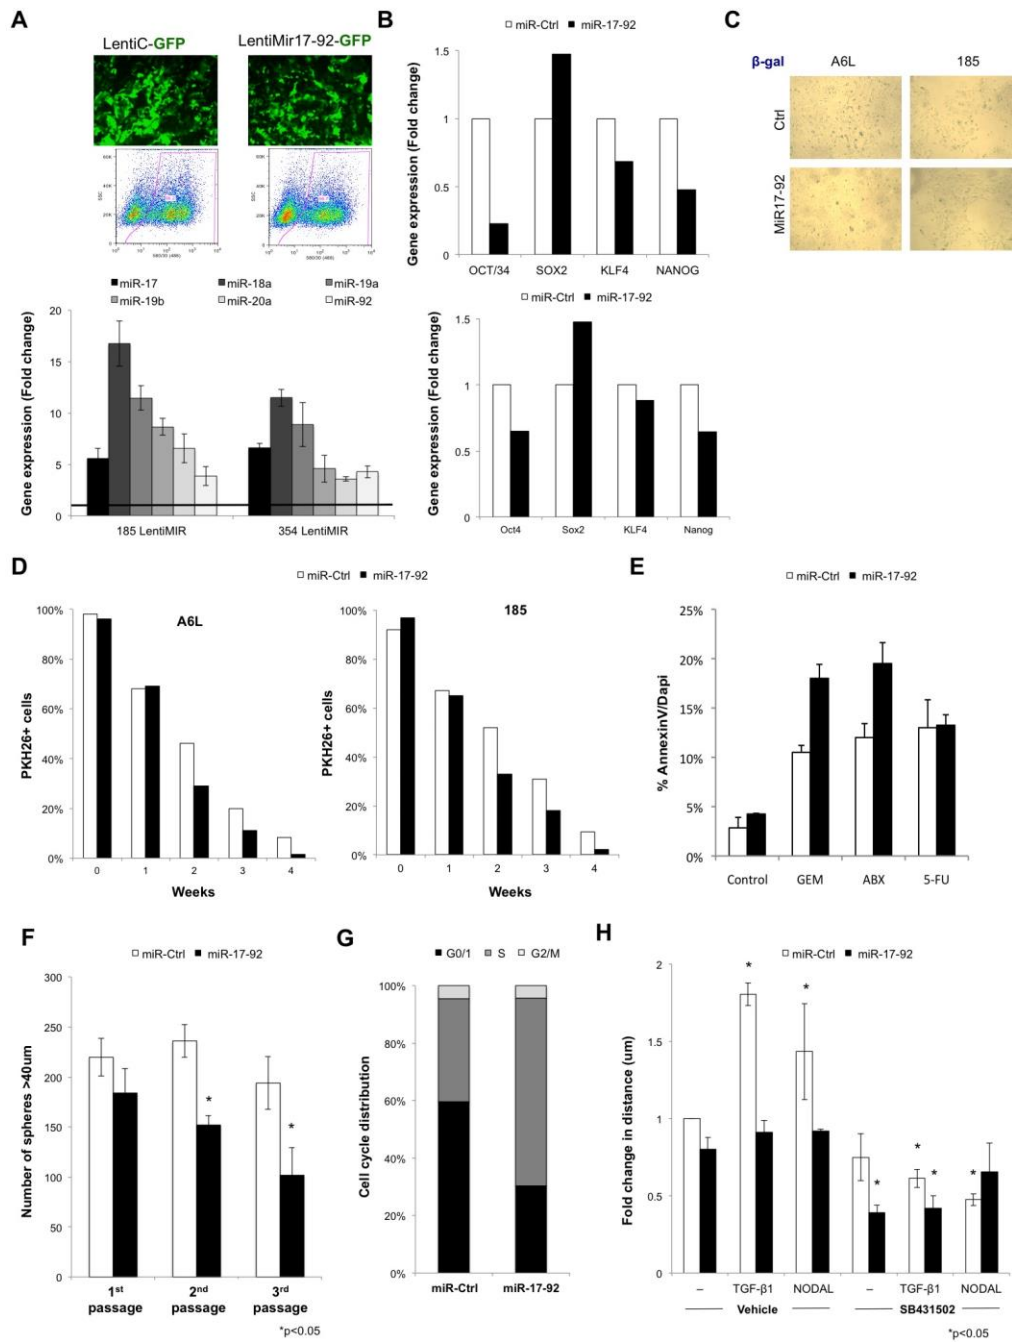

**Figure S5 – miR-17-92 target multiple members of NODAL/TGF- $\beta$ 1 signaling.** (A) Sequence alignment of miR-17-92 family members' seed sequence in *TGFBR2* 3' UTR, *ALK4* 3' UTR, *SMAD2* 3' UTR, *SMAD4* 3' UTR, *p21* 3' UTR, *p57* 3' UTR, and *TBX3* 3' UTR. (B) QPCR analysis for the expression of miR-17-92 family members 96h after induction with Doxycycline. (C) RTqPCR analysis of miR-17-92 target genes after 24h of treatment with single antagonists against each of the six members of the miR-17-92 cluster.

**Figure S5 – miR-17-92 targets multiple members of the Nodal/TGF $\beta$  signaling cascade**

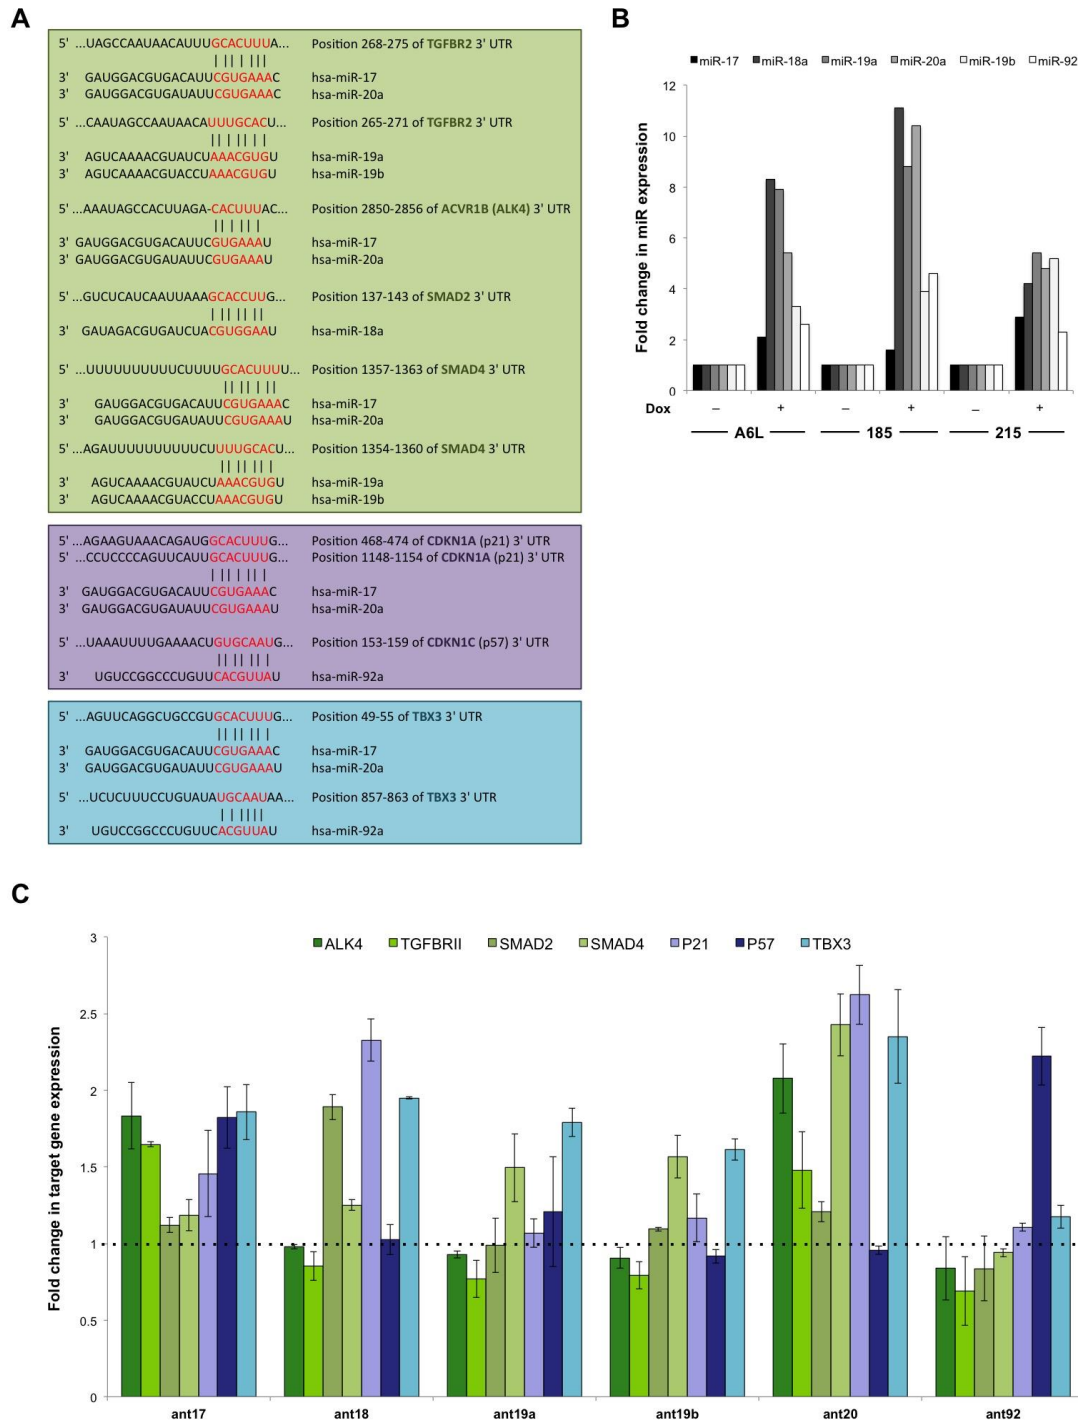

**Figure S6 – Knockdown of p21 or TBX3 inhibits cancer stem cell phenotype.** (A) Representative images of invaded cells (**left panel**). Percentage of invading cells (Ctrl versus sh-p21) through Matrigel™ following stimulation with FBS, NODAL or TGF-β1 (**right panel**). (B) RTqPCR analysis of TBX3 mRNA levels in multiple PDAC sphere cultures (s) compared to their respective adherent controls (n = 3; \*p < 0.05). (C) Western blot analysis for the expression of TBX3 in cells sorted for CD133 surface expression (**upper panel**) and densitometric quantification of the western blot (**lower panel**). (D) QPCR analysis for the expression of TBX3 in cells sorted for ALK4 surface expression. (E) Percentage of invading cells through Matrigel™ following stimulation with NODAL, ACTIVIN or TGF-β1 (n = 3; \*p < 0.05).

**Figure S6 – Knockdown of p21 or TBX3 inhibits cancer stem cell phenotype**

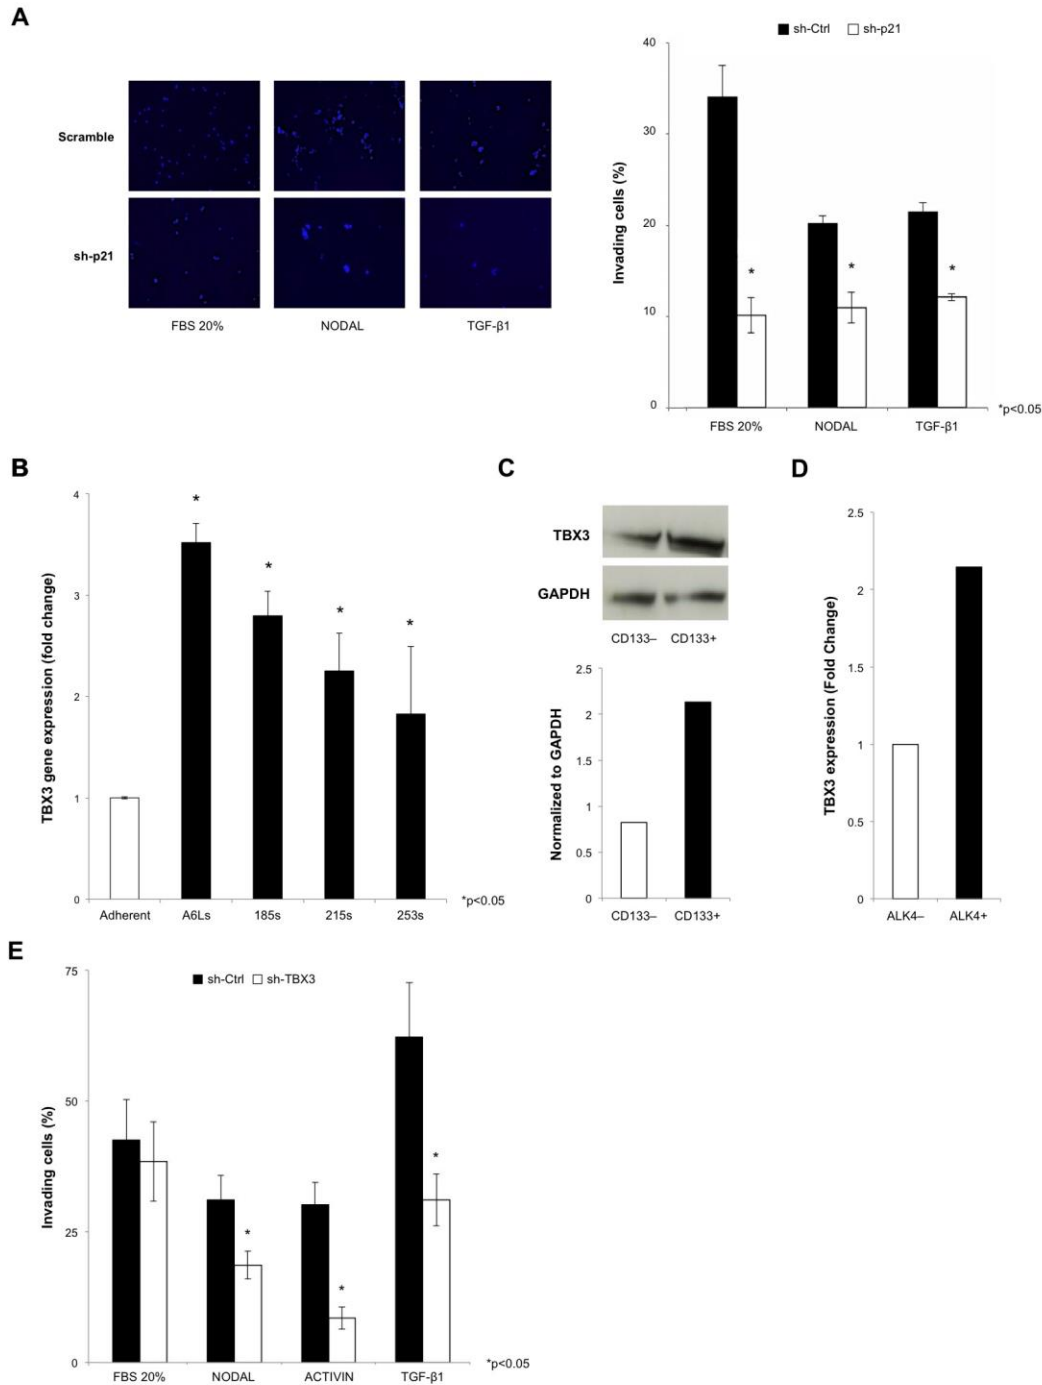

**Figure S7: *In vivo* overexpression of miR-17-92 reverses quiescence and chemoresistance.**

Treatment effects of gemcitabine and abraxaen in miR-17-92 overexpressing cells in established tumors derived from (A) A6L and (B) 185 cells, respectively, in immunocompromised mice. The mean tumor volume is given; n 6 tumors per group. P value was determined by Student t test.

**Figure S7 – *In vivo* overexpression of miR-17-92 reverses quiescence and chemoresistance**

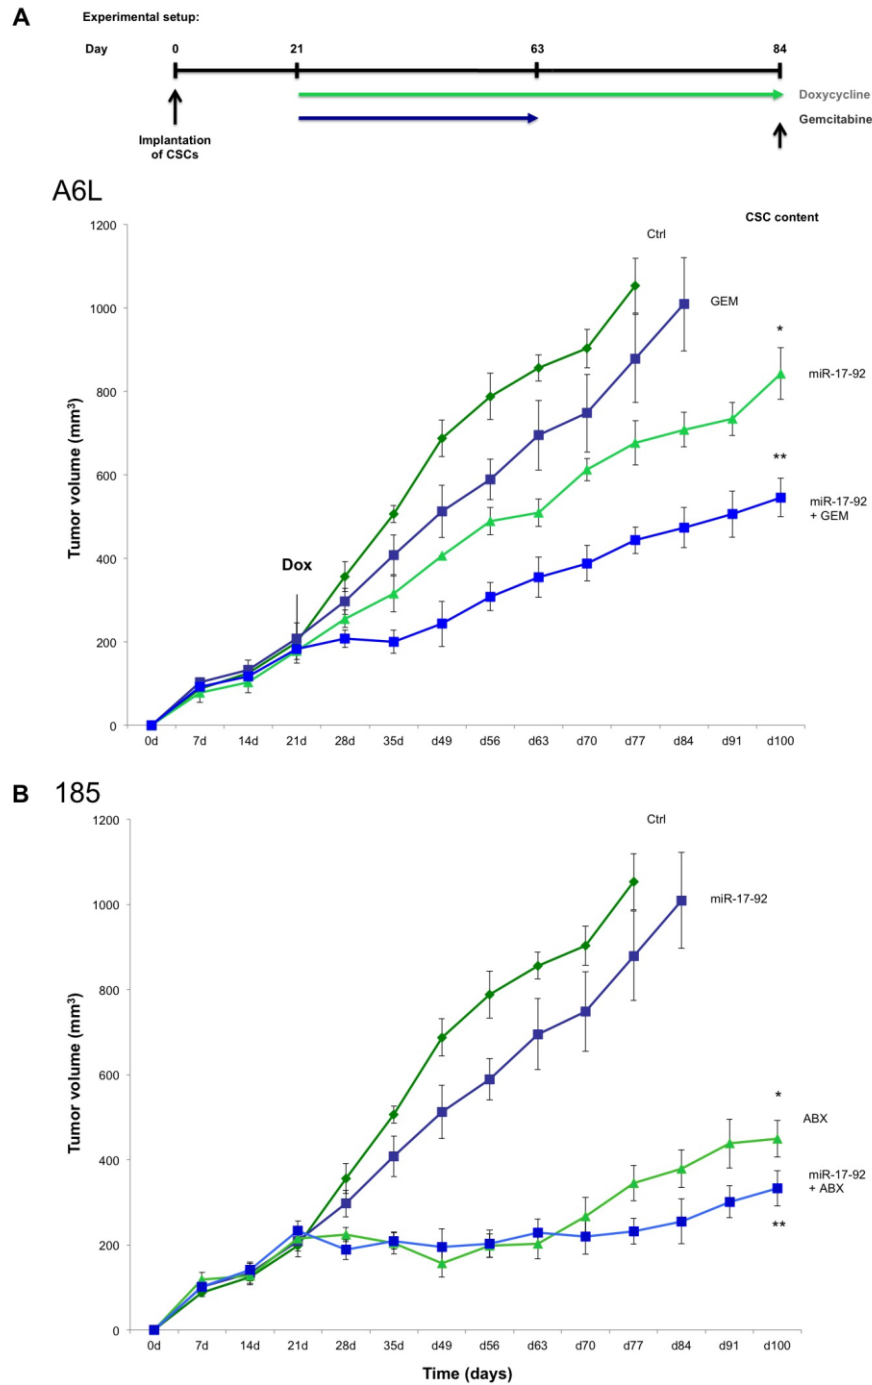

Supplement: gutjnl-2014-308470supp_figures.pdf [file gutjnl-2014-308470supp_figures.pdf]
